# Supplementary material
Source: PubMed Central journal article supplement (PMC4948347)
Supplement: pnas.1608061113.sd01.pdf [file pnas.1608061113.sd01.pdf]

| Group | SPID        | Gene      | peptides (total 851) | tryptic peptides (theory) | peptides/tryptic peptides | type    | peptides | site      | 10-C | 24-C | F-C   | site_known               | PKA_motif (RXXS/T) | description                                                |
|-------|-------------|-----------|----------------------|---------------------------|---------------------------|---------|----------|-----------|------|------|-------|--------------------------|--------------------|------------------------------------------------------------|
| 1     | KAPO_HUMAN  | PRKAR1A/B | 67                   | 20                        | 1                         | bdg     | 43       | bdg       | 0,25 | 0    | -0,61 |                          |                    | protein kinase, cAMP-dependent, regulatory, type I, alpha  |
| 1     | KAPO_HUMAN  | PRKAR1A/B |                      |                           |                           | phospho | 8        | S77+S83   | 0    | 0    | -0,2  | sites_reported (77+83)   | PKA_motif          |                                                            |
| 1     | KAPO_HUMAN  | PRKAR1A/B |                      |                           |                           | phospho | 6        | S77       | 0    | 0    | -0,25 | site_reported            | PKA_motif          |                                                            |
| 1     | KAPO_HUMAN  | PRKAR1A/B |                      |                           |                           | phospho | 8        | S83       | 0    | 0    | 0     | site_reported            |                    |                                                            |
| 1     | KAP1_HUMAN  | PRKAR1A/B |                      |                           |                           | phospho | 2        | S71       | -1   | 0    |       | site_reported            | PKA_motif          | protein kinase, cAMP-dependent, regulatory, type I, beta   |
| 1     | KAP2_HUMAN  | PRKAR2A   | 78                   | 26                        | 0,8955                    | bdg     | 40       | bdg       | 0,21 | 0,21 | -0,25 |                          |                    | protein kinase, cAMP-dependent, regulatory, type II, alpha |
| 1     | KAP2_HUMAN  | PRKAR2A   |                      |                           |                           | phospho | 2        | S58       | 0    | 0    | 0     | site_reported            |                    |                                                            |
| 1     | KAP2_HUMAN  | PRKAR2A   |                      |                           |                           | phospho | 16       | S78+S80   | 0    | 0,5  | 0     | sites_reported (78+80)   |                    |                                                            |
| 1     | KAP2_HUMAN  | PRKAR2A   |                      |                           |                           | phospho | 5        | S78       | 0    | 0    | -0,33 | site_reported            |                    |                                                            |
| 1     | KAP2_HUMAN  | PRKAR2A   |                      |                           |                           | phospho | 2        | S80       | 0    | 0    |       | site_reported            |                    |                                                            |
| 1     | KAP2_HUMAN  | PRKAR2A   |                      |                           |                           | phospho | 9        | S99       | 0    | 0,4  | 0,25  | site_reported            | PKA_motif          |                                                            |
| 1     | KAP2_HUMAN  | PRKAR2A   |                      |                           |                           | phospho | 3        | T104      | 0    | 0    | 1     |                          |                    |                                                            |
| 1     | KAP2_HUMAN  | PRKAR2A   |                      |                           |                           | phospho | 1        | S396      |      |      | 0     |                          |                    |                                                            |
| 1     | KAP3_HUMAN  | PRKAR2B   | 29                   | 25                        | 0,3463                    | bdg     | 16       | bdg       | 0,5  | 0,08 | -0,75 |                          |                    | protein kinase, cAMP-dependent, regulatory, type II, beta  |
| 1     | KAP3_HUMAN  | PRKAR2B   |                      |                           |                           | phospho | 1        | T69       |      |      | -1    | site_reported            |                    |                                                            |
| 1     | KAP3_HUMAN  | PRKAR2B   |                      |                           |                           | phospho | 12       | S114      | 0    | 0    | 0,2   | site_reported            | PKA_motif          |                                                            |
| 1     | KAPCA_HUMAN | PRKACA/B  | 45                   | 21                        | 0,6397                    | bdg     | 29       | bdg       | 0,27 | 0,2  | -0,43 |                          |                    | protein kinase, cAMP-dependent, catalytic, alpha           |
| 1     | KAPCA_HUMAN | PRKACA/B  |                      |                           |                           | phospho | 4        | T198      | 0    | 0,5  | 0     | site_reported            | PKA_motif          |                                                            |
| 1     | KAPCA_HUMAN | PRKACA/B  |                      |                           |                           | phospho | 1        | T202      | 1    | 0    |       |                          |                    |                                                            |
| 1     | KAPCA_HUMAN | PRKACA/B  |                      |                           |                           | phospho | 11       | S339      | 0,17 | 0    | -1    | site_reported            |                    |                                                            |
| 2     | AKA11_HUMAN | AKAP11    | 30                   | 99                        | 0,0905                    | bdg     | 11       | bdg       | 0,62 | 0,5  | 0,67  |                          |                    | A kinase (PRKA) anchor protein 11                          |
| 2     | AKA11_HUMAN | AKAP11    |                      |                           |                           | phospho | 2        | S285+S288 | 0    | 0    | 0     |                          |                    |                                                            |
| 2     | AKA11_HUMAN | AKAP11    |                      |                           |                           | phospho | 3        | S288      | 0    | 0    | 0     |                          |                    |                                                            |
| 2     | AKA11_HUMAN | AKAP11    |                      |                           |                           | phospho | 1        | S422+S433 | -1   | 0    |       | sites_reported (422+433) |                    |                                                            |
| 2     | AKA11_HUMAN | AKAP11    |                      |                           |                           | phospho | 1        | T722      |      |      | 0     |                          |                    |                                                            |
| 2     | AKA11_HUMAN | AKAP11    |                      |                           |                           | phospho | 1        | T981      |      |      | 0     |                          |                    |                                                            |
| 2     | AKA11_HUMAN | AKAP11    |                      |                           |                           | phospho | 1        | S1169     | 0    | 0    |       | site_reported            |                    |                                                            |

|   |             |        |    |     |        |         |    |                 |      |      |       |                          |                  |                                                                                  |
|---|-------------|--------|----|-----|--------|---------|----|-----------------|------|------|-------|--------------------------|------------------|----------------------------------------------------------------------------------|
| 2 | AKA11_HUMAN | AKAP11 |    |     |        | phospho | 1  | S1171           |      |      | 0     | site_reported            | PKA_motif        |                                                                                  |
| 2 | AKA11_HUMAN | AKAP11 |    |     |        | phospho | 2  | S1240/1242      | 0    | 0    | 0     | site_reported (1242)     | PKA_motif (1242) |                                                                                  |
| 2 | AKA11_HUMAN | AKAP11 |    |     |        | phospho | 3  | S1289           | 0    | 0    | 0     |                          |                  |                                                                                  |
| 2 | AKA11_HUMAN | AKAP11 |    |     |        | phospho | 1  | S1337           | 0    | 1    |       | site_reported            |                  |                                                                                  |
| 2 | AKA11_HUMAN | AKAP11 |    |     |        | phospho | 2  | T1485           | 1    | 0    | 0     |                          |                  |                                                                                  |
| 2 | AKA11_HUMAN | AKAP11 |    |     |        | phospho | 1  | S1611           | 0    | 1    |       |                          | PKA_motif        |                                                                                  |
| 2 | AKAP1_HUMAN | AKAP1  | 2  | 47  | 0,0127 | bdg     | 2  | bdg             | -0,5 | 0,5  |       |                          |                  | A kinase (PRKA) anchor protein 1                                                 |
| 2 | AKAP2_HUMAN | AKAP2  | 4  | 44  | 0,0271 | bdg     | 1  | bdg             |      |      | 0     |                          |                  | A kinase (PRKA) anchor protein 2                                                 |
| 2 | AKAP2_HUMAN | AKAP2  |    |     |        | phospho | 2  | S135/137        | -0,5 | 0    |       |                          |                  |                                                                                  |
| 2 | AKAP2_HUMAN | AKAP2  |    |     |        | phospho | 1  | T781            |      |      | 1     | site_reported            |                  |                                                                                  |
| 2 | AKAP3_HUMAN | AKAP3  | 1  | 55  | 0,0054 | phospho | 1  | S426            | -1   | -1   |       |                          |                  | A kinase (PRKA) anchor protein 3                                                 |
| 2 | AKAP5_HUMAN | AKAP5  | 1  | 21  | 0,0142 | bdg     | 1  | bdg             |      |      | 1     |                          |                  | A kinase (PRKA) anchor protein 5                                                 |
| 2 | AKAP8_HUMAN | AKAP8  | 4  | 33  | 0,0362 | phospho | 2  | S323+S328       | 0    | 0    | 0     | sites_reported (323+328) | PKA_motif (323)  | A kinase (PRKA) anchor protein 8                                                 |
| 2 | AKAP8_HUMAN | AKAP8  |    |     |        | phospho | 2  | S339            |      |      | 0     | site_reported            |                  |                                                                                  |
| 2 | AKAP9_HUMAN | AKAP9  | 4  | 282 | 0,0042 | bdg     | 4  | bdg             | 0    | -1   | 0     |                          |                  | A kinase (PRKA) anchor protein (yotiao) 9                                        |
| 3 | NDK3_HUMAN  | NME3   | 4  | 13  | 0,0918 | bdg     | 4  | bdg             | 0,75 | 0,5  |       |                          |                  | NME/NM23 nucleoside diphosphate kinase 3                                         |
| 3 | NDKA_HUMAN  | NME1   | 14 | 12  | 0,3483 | bdg     | 14 | bdg             | 0,38 | 0,38 | 0     |                          |                  | NME/NM23 nucleoside diphosphate kinase 1                                         |
| 3 | NDKM_HUMAN  | NME4   | 18 | 14  | 0,3838 | bdg     | 18 | bdg             | 0,25 | 0    | -0,5  |                          |                  | NME/NM23 nucleoside diphosphate kinase 4                                         |
| 3 | PYR1_HUMAN  | CAD    | 82 | 118 | 0,2074 | bdg     | 64 | bdg             | 0,49 | 0,15 | -0,09 |                          |                  | carbamoyl-phosphate synthetase 2, aspartate transcarbamylase, and dihydroorotase |
| 3 | PYR1_HUMAN  | CAD    |    |     |        | phospho | 1  | S1406           | 1    | 0    |       | site_reported            | PKA_motif        |                                                                                  |
| 3 | PYR1_HUMAN  | CAD    |    |     |        | phospho | 3  | ST1823/28/31/33 | 0    | 1    | 1     |                          |                  |                                                                                  |
| 3 | PYR1_HUMAN  | CAD    |    |     |        | phospho | 14 | S1859           | 0,12 | 0,38 | 0,33  | site_reported            |                  |                                                                                  |
| 3 | PYRG1_HUMAN | CTPS1  | 1  | 35  | 0,0085 | phospho | 1  | S575            | 0    | 0    |       | site_reported            |                  | CTP synthase 1                                                                   |
| 4 | AAPK1_HUMAN | PRKAA1 | 4  | 35  | 0,0341 | phospho | 2  | TS183/184       | -1   | 1    | 0     | site_reported            |                  | protein kinase, AMP-activated, alpha 1 catalytic subunit                         |
| 4 | AAPK1_HUMAN | PRKAA1 |    |     |        | phospho | 2  | S496            | 0    | 0    | 1     | site_reported            | PKA_motif        |                                                                                  |
| 4 | KGP1_HUMAN  | PRKG1  | 12 | 43  | 0,0833 | bdg     | 3  | bdg             | 0,67 | 0    |       |                          |                  | protein kinase, cGMP-dependent, type I                                           |
| 4 | KGP1_HUMAN  | PRKG1  |    |     |        | phospho | 1  | S65             | 0    | -1   |       |                          |                  |                                                                                  |

|   |             |         |    |     |        |         |    |      |      |       |      |               |           |                                                                                  |
|---|-------------|---------|----|-----|--------|---------|----|------|------|-------|------|---------------|-----------|----------------------------------------------------------------------------------|
| 4 | KGP1_HUMAN  | PRKG1   |    |     |        | phospho | 1  | S73  |      |       | 0    |               |           |                                                                                  |
| 4 | KGP1_HUMAN  | PRKG1   |    |     |        | phospho | 2  | S273 | 0    | 0     | 0    | site_reported | PKA_motif |                                                                                  |
| 4 | KGP1_HUMAN  | PRKG1   |    |     |        | phospho | 5  | T515 | 0,75 | 0,75  | 0    | site_reported |           |                                                                                  |
| 4 | MYOME_HUMAN | PDE4DIP | 3  | 153 | 0,0059 | bdg     | 3  | bdg  | 0,33 | 0,33  |      |               |           | phosphodiesterase 4D interacting protein                                         |
| 4 | PDE4A_HUMAN | PDE4A   | 2  | 41  | 0,0146 | phospho | 1  | S145 |      |       | 0    | site_reported | PKA_motif | phosphodiesterase 4A, cAMP-specific                                              |
| 4 | PDE4A_HUMAN | PDE4A   |    |     |        | phospho | 1  | S209 |      |       | -1   | site_reported |           |                                                                                  |
| 5 | ACDSB_HUMAN | ACDSB   | 3  | 27  | 0,0332 | bdg     | 3  | bdg  | 0,33 | 0     |      |               |           | acyl-CoA dehydrogenase, short/branched chain                                     |
| 5 | ACOX1_HUMAN | ACOX1   | 1  | 38  | 0,0079 | phospho | 1  | S540 | -1   | 0     |      |               |           | acyl-CoA oxidase 1, palmitoyl                                                    |
| 5 | BCKD_HUMAN  | BCKDK   | 4  | 23  | 0,0519 | phospho | 1  | S31  | -1   | 0     |      | site_reported | PKA_motif | branched chain ketoacid dehydrogenase kinase                                     |
| 5 | BCKD_HUMAN  | BCKDK   |    |     |        | phospho | 3  | S33  | -1   | 0     | 0    | site_reported | PKA_motif |                                                                                  |
| 5 | MMSA_HUMAN  | ALDH6A1 | 1  | 35  | 0,0085 | phospho | 1  | T507 |      |       | 0    |               |           | aldehyde dehydrogenase 6 family, member A1                                       |
| 5 | ODBA_HUMAN  | BCKDHA  | 3  | 27  | 0,0332 | phospho | 2  | S337 | 0    | 0     |      | site_reported |           | branched chain keto acid dehydrogenase E1, alpha polypeptide                     |
| 5 | ODBA_HUMAN  | BCKDHA  |    |     |        | phospho | 1  | S347 | 0    | 0     |      | site_reported |           |                                                                                  |
| 6 | F262_HUMAN  | PFKFB2  | 1  | 39  | 0,0077 | phospho | 1  | S148 | 0    | 0     |      |               |           | 6-phosphofructo-2-kinase/fructose-2,6-biphosphatase 2                            |
| 6 | GCDH_HUMAN  | GCDH    | 17 | 30  | 0,1692 | bdg     | 17 | bdg  | 0,13 | 0,07  | 0    |               |           | glutaryl-CoA dehydrogenase                                                       |
| 6 | GDE_HUMAN   | AGL     | 12 | 100 | 0,0358 | bdg     | 12 | bdg  | 0,57 | 0,14  | -0,6 |               |           | amyl-alpha-1, 6-glucosidase, 4-alpha-glucanotransferase                          |
| 6 | ODO1_HUMAN  | OGDH    | 2  | 55  | 0,0109 | bdg     | 2  | bdg  |      |       | 0    |               |           | oxoglutarate (alpha-ketoglutarate) dehydrogenase (lipoamide)                     |
| 6 | ODO2_HUMAN  | DLST    | 4  | 25  | 0,0478 | bdg     | 4  | bdg  | 0    | -1    | -1   |               |           | dihydrolipoamide S-succinyltransferase (E2 component of 2-oxo-glutarate complex) |
| 6 | ODPA_HUMAN  | PDHA1   | 1  | 27  | 0,0111 | phospho | 1  | S232 | 1    | 0     |      | site_reported |           | pyruvate dehydrogenase (lipoamide) alpha 1                                       |
| 7 | HEM1_HUMAN  | ALAS1   | 9  | 44  | 0,0611 | bdg     | 9  | bdg  | 0,29 | 0     | 0    |               |           | aminolevulinate, delta-, synthase 1                                              |
| 7 | HEM6_HUMAN  | CPOX    | 67 | 30  | 0,6667 | bdg     | 62 | bdg  | 0,05 | -0,05 | 0    |               |           | coproporphyrinogen oxidase                                                       |

|   |             |          |    |    |        |         |    |      |      |       |       |               |           |                                                                                          |
|---|-------------|----------|----|----|--------|---------|----|------|------|-------|-------|---------------|-----------|------------------------------------------------------------------------------------------|
| 7 | HEM6_HUMAN  | CPOX     |    |    |        | phospho | 5  | S112 | 0    | 0     | 0     |               | PKA_motif |                                                                                          |
| 8 | ANPRA_HUMAN | NPR1     | 4  | 62 | 0,0193 | bdg     | 4  | bdg  | 0    | 1     | 0,33  |               |           | natriuretic peptide receptor A/guanylate cyclase A (atrionatriuretic peptide receptor A) |
| 8 | DHE3_HUMAN  | GLUD1    | 4  | 35 | 0,0341 | bdg     | 4  | bdg  |      |       | -1    |               |           | glutamate dehydrogenase 1                                                                |
| 8 | FOLR1_HUMAN | FOLR1    | 2  | 17 | 0,0351 | bdg     | 2  | bdg  | 0    | 0     | -1    |               |           | folate receptor 1 (adult)                                                                |
| 8 | HORN_HUMAN  | HRNR     | 6  | 78 | 0,023  | bdg     | 6  | bdg  | -0,5 | 0     | 1     |               |           | hornerin                                                                                 |
| 8 | LG3BP_HUMAN | LGALS3BP | 4  | 33 | 0,0362 | bdg     | 4  | bdg  | 0,67 | 0     | 0     |               |           | lectin, galactoside-binding, soluble, 3 binding protein                                  |
| 8 | LYPL1_HUMAN | LYPLAL1  | 9  | 17 | 0,158  | bdg     | 9  | bdg  | 0    | 0     | 0     |               |           | lysophospholipase-like 1                                                                 |
| 8 | MCCB_HUMAN  | MCCC2    | 2  | 35 | 0,0171 | bdg     | 1  | bdg  | 1    | 0     |       |               |           | methylcrotonoyl-CoA carboxylase 2 (beta)                                                 |
| 8 | MCCB_HUMAN  | MCCC2    |    |    |        | phospho | 1  | T238 |      |       | 0     |               |           |                                                                                          |
| 8 | MTMR3_HUMAN | MTMR3    | 1  | 69 | 0,0043 | phospho | 1  | S633 | 0    | 0     |       | site_reported | PKA_motif | myotubularin related protein 3                                                           |
| 8 | MTMR4_HUMAN | MTMR4    | 1  | 69 | 0,0043 | phospho | 1  | S629 |      |       | -1    |               | PKA_motif | myotubularin related protein 4                                                           |
| 8 | NUDT6_HUMAN | NUDT6    | 2  | 23 | 0,026  | bdg     | 2  | bdg  | 0,5  | 0     |       |               |           | nudix (nucleoside diphosphate linked moiety X)-type motif 6                              |
| 8 | QORX_HUMAN  | TP53I3   | 6  | 17 | 0,1054 | bdg     | 6  | bdg  |      |       | -0,67 |               |           | tumor protein p53 inducible protein 3                                                    |
| 8 | TALDO_HUMAN | TALDO1   | 1  | 24 | 0,0124 | phospho | 1  | S75  |      |       | 0     |               |           | transaldolase 1                                                                          |
| 8 | THTR_HUMAN  | TST      | 3  | 20 | 0,0448 | bdg     | 3  | bdg  | 0,67 | 0     |       |               |           | thiosulfate sulfurtransferase (rhodanese)                                                |
| 8 | ZADH2_HUMAN | ZADH2    | 17 | 22 | 0,2307 | bdg     | 17 | bdg  | 0    | -0,09 | 0     |               |           | zinc binding alcohol dehydrogenase domain containing 2                                   |
| 9 | AA3R_HUMAN  | ADORA3   | 1  | 10 | 0,0299 | phospho | 1  | S213 | 0    | 0     |       |               |           | adenosine A3 receptor                                                                    |
| 9 | GP161_HUMAN | GPR161   | 1  | 27 | 0,0111 | phospho | 1  | S430 |      |       | 0     |               | PKA_motif | G protein-coupled receptor 161                                                           |
| 9 | GRD2I_HUMAN | GRID2IP  | 1  | 70 | 0,0043 | phospho | 1  | S235 |      |       | 1     |               | PKA_motif | glutamate receptor, ionotropic, delta 2 (Grid2) interacting protein                      |
| 9 | IRK3_HUMAN  | KCNJ3    | 1  | 23 | 0,013  | phospho | 1  | S225 | 1    | 0     |       |               |           | potassium inwardly-rectifying channel, subfamily J, member 3                             |

|   |             |        |    |    |        |         |    |                |       |      |      |                              |                 |                                                      |
|---|-------------|--------|----|----|--------|---------|----|----------------|-------|------|------|------------------------------|-----------------|------------------------------------------------------|
| 9 | IRS4_HUMAN  | IRS4   | 2  | 67 | 0,0089 | bdg     | 1  | bdg            | -1    | 0    |      |                              |                 | insulin receptor substrate 4                         |
| 9 | IRS4_HUMAN  | IRS4   |    |    |        | phospho | 1  | S1231          | -1    | -1   |      | site_reported                | PKA_motif       |                                                      |
| 9 | KCC2B_HUMAN | CAMK2B | 2  | 36 | 0,0166 | bdg     | 2  | bdg            | 0     | 0    |      |                              |                 | calcium/calmodulin-dependent protein kinase II beta  |
| 9 | KCC2D_HUMAN | CAMK2D | 56 | 30 | 0,5572 | bdg     | 16 | bdg            | 0,18  | 0    | -0,6 |                              |                 | calcium/calmodulin-dependent protein kinase II delta |
| 9 | KCC2D_HUMAN | CAMK2D |    |    |        | phospho | 1  | T287           | 0     | 0    |      | site_reported                | PKA_motif       |                                                      |
| 9 | KCC2D_HUMAN | CAMK2D |    |    |        | phospho | 1  | S315+S319      | -1    | 0    |      | sites_reported (315+319)     | PKA_motif (315) |                                                      |
| 9 | KCC2D_HUMAN | CAMK2D |    |    |        | phospho | 9  | S330           | 0     | 0,33 | 0,67 | site_reported                |                 |                                                      |
| 9 | KCC2D_HUMAN | CAMK2D |    |    |        | phospho | 12 | T331           | -0,17 | 0    | 0,17 | site_reported                |                 |                                                      |
| 9 | KCC2D_HUMAN | CAMK2D |    |    |        | phospho | 3  | T331+S333      | 0     | 0    | 0    | sites_reported (331+333)     |                 |                                                      |
| 9 | KCC2D_HUMAN | CAMK2D |    |    |        | phospho | 2  | T331+S333+S334 | 0     | 0    | 0    | sites_reported (331+333+334) |                 |                                                      |
| 9 | KCC2D_HUMAN | CAMK2D |    |    |        | phospho | 2  | T331+T337      |       |      | 0    | sites_reported (331+337)     |                 |                                                      |
| 9 | KCC2D_HUMAN | CAMK2D |    |    |        | phospho | 1  | T331+S334      |       |      | 1    | sites_reported (331+334)     |                 |                                                      |
| 9 | KCC2D_HUMAN | CAMK2D |    |    |        | phospho | 1  | T331+T336      | 0     | 0    |      | sites_reported (331+336)     |                 |                                                      |
| 9 | KCC2D_HUMAN | CAMK2D |    |    |        | phospho | 1  | S333           |       |      | 1    | site_reported                |                 |                                                      |
| 9 | KCC2D_HUMAN | CAMK2D |    |    |        | phospho | 1  | S333+S334+T336 | 0     | 0    |      | sites_reported (333+334+336) |                 |                                                      |
| 9 | KCC2D_HUMAN | CAMK2D |    |    |        | phospho | 2  | S334           | 0     | -1   | -1   | site_reported                |                 |                                                      |
| 9 | KCC2D_HUMAN | CAMK2D |    |    |        | phospho | 1  | T337           |       |      | 0    | site_reported                |                 |                                                      |
| 9 | KCC2D_HUMAN | CAMK2D |    |    |        | phospho | 2  | S472           | 0     | 0    | 0    | site_reported                | PKA_motif       |                                                      |
| 9 | KCC2D_HUMAN | CAMK2D |    |    |        | phospho | 1  | S494           |       |      | -1   |                              |                 |                                                      |
| 9 | KCC2G_HUMAN | CAMK2G | 53 | 30 | 0,5274 | bdg     | 21 | bdg            | 0     | 0,36 | 0,1  |                              |                 | calcium/calmodulin-dependent protein kinase II gamma |
| 9 | KCC2G_HUMAN | CAMK2G |    |    |        | phospho | 2  | S36            | -1    | 0    | 1    |                              |                 |                                                      |
| 9 | KCC2G_HUMAN | CAMK2G |    |    |        | phospho | 1  | S267+T277      |       |      | 0    |                              |                 |                                                      |
| 9 | KCC2G_HUMAN | CAMK2G |    |    |        | phospho | 1  | T277+S280      |       |      | 0    | site_reported (280)          |                 |                                                      |
| 9 | KCC2G_HUMAN | CAMK2G |    |    |        | phospho | 2  | T287           | 0     | 0    | 0    | site_reported                | PKA_motif       |                                                      |
| 9 | KCC2G_HUMAN | CAMK2G |    |    |        | phospho | 1  | S320           |       |      | 0    |                              |                 |                                                      |
| 9 | KCC2G_HUMAN | CAMK2G |    |    |        | phospho | 2  | S325           | 0     | 0    | 0    | site_reported                |                 |                                                      |
| 9 | KCC2G_HUMAN | CAMK2G |    |    |        | phospho | 2  | S333           |       |      | 1    |                              |                 |                                                      |
| 9 | KCC2G_HUMAN | CAMK2G |    |    |        | phospho | 1  | S338           |       |      | 1    | site_reported                |                 |                                                      |
| 9 | KCC2G_HUMAN | CAMK2G |    |    |        | phospho | 1  | T369           |       |      | 0    |                              |                 |                                                      |

|    |             |         |    |    |        |         |    |             |       |      |       |                              |                    |                                                                                        |
|----|-------------|---------|----|----|--------|---------|----|-------------|-------|------|-------|------------------------------|--------------------|----------------------------------------------------------------------------------------|
| 9  | KCC2G_HUMAN | CAMK2G  |    |    |        | phospho | 1  | S379+T382   |       |      | 0     | sites_reported<br>(379+382)  |                    |                                                                                        |
| 9  | KCC2G_HUMAN | CAMK2G  |    |    |        | phospho | 1  | S380        |       |      | 1     |                              |                    |                                                                                        |
| 9  | KCC2G_HUMAN | CAMK2G  |    |    |        | phospho | 2  | S381        | 0     | 0    | 0     | site_reported                |                    |                                                                                        |
| 9  | KCC2G_HUMAN | CAMK2G  |    |    |        | phospho | 8  | T382        | 0     | 0    | 0,5   | site_reported                |                    |                                                                                        |
| 9  | KCC2G_HUMAN | CAMK2G  |    |    |        | phospho | 6  | T382+S384   | 0     | 0    | 0     | sites_reported<br>(382+384)  |                    |                                                                                        |
| 9  | KCC2G_HUMAN | CAMK2G  |    |    |        | phospho | 1  | S394        | 0     | 1    |       |                              |                    |                                                                                        |
| 9  | M3K15_HUMAN | MAP3K15 | 1  | 74 | 0,004  | phospho | 1  | S68         | 0     | 0    |       |                              |                    | mitogen-activated protein<br>kinase kinase kinase 15                                   |
| 9  | M3K6_HUMAN  | MAP3K6  | 2  | 66 | 0,009  | phospho | 2  | S914+S916   | 0,5   | 0,5  |       | site_reported<br>(914)       | PKA_motif<br>(916) | mitogen-activated protein<br>kinase kinase kinase 6                                    |
| 9  | STK3_HUMAN  | STK3    | 1  | 31 | 0,0096 | phospho | 1  | S316        |       |      | 0     | site_reported                |                    | serine/threonine kinase 3                                                              |
| 9  | TFG_HUMAN   | TFG     | 17 | 13 | 0,3904 | bdg     | 17 | bdg         | 0,1   | 0,3  | -0,29 |                              |                    | TRK-fused gene                                                                         |
| 9  | TM231_HUMAN | TMEM231 | 2  | 17 | 0,0351 | bdg     | 2  | bdg         | 0     | -1   | 1     |                              |                    | transmembrane protein 231                                                              |
| 9  | TRPC3_HUMAN | TRPC3   | 1  | 48 | 0,0062 | phospho | 1  | S735+S745   |       |      | 0     |                              |                    | transient receptor potential<br>cation channel, subfamily C,<br>member 3               |
| 10 | ANM6_HUMAN  | PRMT6   | 5  | 17 | 0,0878 | phospho | 5  | T21         | 0     | 0    | 0,33  | site_reported                |                    | protein arginine<br>methyltransferase 6                                                |
| 10 | EWS_HUMAN   | EWSR1   | 8  | 24 | 0,0995 | bdg     | 8  | bdg         | 0     | 0,25 | 0     |                              |                    | Ewing sarcoma breakpoint<br>region 1                                                   |
| 10 | FUS_HUMAN   | FUS     | 32 | 18 | 0,5307 | bdg     | 32 | bdg         | -0,21 | 0    | -0,33 |                              |                    | fused in sarcoma                                                                       |
| 10 | HDAC6_HUMAN | HDAC6   | 2  | 42 | 0,0142 | bdg     | 1  | bdg         |       |      | -1    |                              |                    | histone deacetylase 6                                                                  |
| 10 | HDAC6_HUMAN | HDAC6   |    |    |        | phospho | 1  | S22         |       |      | 0     | site_reported                |                    |                                                                                        |
| 10 | IF2B1_HUMAN | IGF2BP1 | 1  | 36 | 0,0083 | phospho | 1  | S181        | 0     | 0    |       | site_reported                | PKA_motif          | insulin-like growth factor 2<br>mRNA binding protein 1                                 |
| 10 | RBP56_HUMAN | TAF15   | 21 | 28 | 0,2239 | bdg     | 18 | bdg         | -0,4  | 0,2  | 0,38  |                              |                    | TAF15 RNA polymerase II,<br>TATA box binding protein<br>(TBP)-associated factor, 68kDa |
| 10 | RBP56_HUMAN | TAF15   |    |    |        | phospho | 2  | S375        | 0     | 0    | 1     |                              | PKA_motif          |                                                                                        |
| 10 | RBP56_HUMAN | TAF15   |    |    |        | phospho | 1  | S387        |       |      | 1     |                              |                    |                                                                                        |
| 10 | RU17_HUMAN  | SNRNP70 | 2  | 21 | 0,0284 | phospho | 2  | S410        | -1    | -1   | 1     | site_reported                |                    | small nuclear<br>ribonucleoprotein 70kDa (U1)                                          |
| 10 | SIN3B_HUMAN | SIN3B   | 2  | 71 | 0,0084 | bdg     | 1  | bdg         | 1     | 1    |       |                              |                    | SIN3 transcription regulator<br>homolog B (yeast)                                      |
| 10 | SIN3B_HUMAN | SIN3B   |    |    |        | phospho | 1  | S603        | 0     | 0    |       |                              |                    |                                                                                        |
| 10 | TRA2B_HUMAN | TRA2B   | 3  | 11 | 0,0814 | phospho | 2  | S95+S97+S99 | -1    | -0,5 |       | sites_reported<br>(95+97+99) | PKA_motif<br>(95)  |                                                                                        |

|    |             |         |   |     |        |         |   |           |     |      |      |                             |                        |                                                                                  |
|----|-------------|---------|---|-----|--------|---------|---|-----------|-----|------|------|-----------------------------|------------------------|----------------------------------------------------------------------------------|
| 10 | TRA2B_HUMAN | TRA2B   |   |     |        | phospho | 1 | S264+S266 | -1  | -1   |      | site_reported<br>(264+266)  | PKA_motif<br>(264+266) | transformer 2 beta homolog<br>(Drosophila)                                       |
| 11 | CNTP1_HUMAN | CNTNAP1 | 2 | 75  | 0,008  | bdg     | 2 | bdg       |     |      | 1    |                             |                        | contactin associated protein 1                                                   |
| 11 | DYL1_HUMAN  | DYNLL1  | 3 | 5   | 0,1791 | bdg     | 3 | bdg       | 0,5 | 1    | 1    |                             |                        | dynein, light chain, LC8-type 1                                                  |
| 11 | KI13B_HUMAN | KIF13B  | 1 | 102 | 0,0029 | phospho | 1 | S1497     | 1   | 1    |      |                             |                        | kinesin family member 13B                                                        |
| 11 | KIFA3_HUMAN | KIFAP3  | 2 | 47  | 0,0127 | phospho | 2 | S104      | 0   | 0    | 1    |                             |                        | kinesin-associated protein 3                                                     |
| 12 | ELMD1_HUMAN | ELMOD1  | 1 | 15  | 0,0199 | phospho | 1 | T82       | 0   | 0    |      |                             |                        | ELMO/CED-12 domain<br>containing 1                                               |
| 12 | RB11A_HUMAN | RAB11A  | 1 | 15  | 0,0199 | phospho | 1 | S177+S182 |     |      | 0    |                             | PKA_motif<br>(177)     | RAB11A, member RAS<br>oncogene family                                            |
| 12 | SEP11_HUMAN | SEPT11  | 1 | 25  | 0,0119 | phospho | 1 | S412      | 0   | 0    |      |                             |                        | septin 11                                                                        |
| 13 | AN32B_HUMAN | ANP32B  | 1 | 10  | 0,0299 | phospho | 1 | T244      | -1  | 1    |      | site_reported               |                        | acidic (leucine-rich) nuclear<br>phosphoprotein 32 family,<br>member B           |
| 13 | ANR60_HUMAN | ANKRD60 | 2 | 24  | 0,0249 | phospho | 2 | S29       |     |      | -0,5 |                             |                        | ankyrin repeat domain 60                                                         |
| 13 | ASPM_HUMAN  | ASPM    | 2 | 221 | 0,0027 | bdg     | 2 | bdg       | 0   | 1    | 1    |                             |                        | asp (abnormal spindle)<br>homolog, microcephaly<br>associated (Drosophila)       |
| 13 | CAPR1_HUMAN | CAPRIN1 | 2 | 29  | 0,0206 | bdg     | 2 | bdg       | 0   | -1   | 1    |                             |                        | cell cycle associated protein 1                                                  |
| 13 | CCD25_HUMAN | CCDC25  | 2 | 17  | 0,0351 | bdg     | 2 | bdg       | 0   | 1    | 0    |                             |                        | coiled-coil domain containing<br>25                                              |
| 13 | CHIP_HUMAN  | STUB1   | 2 | 24  | 0,0249 | phospho | 2 | S19       | 0,5 | 0,5  |      | site_reported               |                        | STIP1 homology and U-box<br>containing protein 1, E3<br>ubiquitin protein ligase |
| 13 | DBPA_HUMAN  | CSDA    | 5 | 19  | 0,0786 | bdg     | 4 | bdg       | 0   | 0    | 0,67 |                             |                        | cold shock domain protein A                                                      |
| 13 | DBPA_HUMAN  | CSDA    |   |     |        | phospho | 1 | S38       |     |      | 1    | site_reported               |                        |                                                                                  |
| 13 | HECD2_HUMAN | HECTD2  | 2 | 44  | 0,0136 | bdg     | 2 | bdg       | -1  | -1   | 1    |                             |                        | HECT domain containing E3<br>ubiquitin protein ligase 2                          |
| 13 | S39A7_HUMAN | SLC39A7 | 2 | 14  | 0,0426 | phospho | 2 | S275+S276 |     |      | 1    | sites_reported<br>(275+276) |                        | solute carrier family 39 (zinc<br>transporter), member 7                         |
| 13 | SC23A_HUMAN | SEC23A  | 2 | 41  | 0,0146 | bdg     | 2 | bdg       | 0   | 0    | 0    |                             |                        | Sec23 homolog A (S.<br>cerevisiae)                                               |
| 13 | SSA27_HUMAN | SSSCA1  | 2 | 10  | 0,0597 | bdg     | 2 | bdg       | 0   | -0,5 |      |                             |                        | Sjogren<br>syndrome/scleroderma<br>autoantigen 1                                 |

|    |             |        |   |      |        |         |   |       |     |   |    |               |  |                         |
|----|-------------|--------|---|------|--------|---------|---|-------|-----|---|----|---------------|--|-------------------------|
| 13 | TITIN_HUMAN | TTN    | 2 | 2157 | 0,0003 | bdg     | 1 | bdg   | 0   | 0 |    |               |  | titin                   |
| 13 | TITIN_HUMAN | TTN    |   |      |        | phospho | 1 | T4454 |     |   | 0  |               |  |                         |
| 13 | ZN502_HUMAN | ZNF502 | 3 | 41   | 0,0218 | bdg     | 3 | bdg   | 0,5 | 1 | -1 |               |  | zinc finger protein 502 |
| 13 | ZN576_HUMAN | ZNF576 | 2 | 12   | 0,0498 | phospho | 2 | T120  | -1  | 0 |    | site_reported |  | zinc finger protein 576 |
